# Supplementary material for: A ruthenium nitrosyl complex-based highly selective colorimetric sensor for biological H2S and H2S–NO cross-talk regulated release of NO
Source: Royal Society of Chemistry journal article supplement (doi:10.1039/d2dt03108f), 2022-12-12
Supplement: d2dt03108f1.pdf [file d2dt03108f1.pdf]

## Ruthenium nitrosyl complex based highly selective colorimetric sensor for biological H<sub>2</sub>S and H<sub>2</sub>S-NO cross talk regulated release of NO

Nancy Sharma<sup>a</sup>, Vinod Kumar<sup>a</sup> and D. Amilan Jose<sup>\*a</sup>

<sup>a</sup>Department of Chemistry, National Institute of Technology (NIT) Kurukshetra,

Kurukshetra -136119, Haryana, INDIA

Email: [amilanjosenit@nitkkr.ac.in](mailto:amilanjosenit@nitkkr.ac.in) and [amilanjose@gmail.com](mailto:amilanjose@gmail.com)

### 1. Materials

Modified Greiss reagent, ammonium hexafluorophosphate, Sodium Hydrosulfide (NaHS), 1-bromooctadecane, potassium chloride, potassium pentachloronitrosylruthenate(II), Tetrabutylammonium salts of various anions (F<sup>-</sup>, Cl<sup>-</sup>, Br<sup>-</sup>, I<sup>-</sup>, CN<sup>-</sup>, CH<sub>3</sub>COO<sup>-</sup>, NO<sub>3</sub><sup>-</sup>, HSO<sub>4</sub><sup>-</sup>, PO<sub>4</sub><sup>3-</sup>, PPI), Adenosine-5'-triphosphate disodium salt hydrate, Adenosine-5'-diphosphate sodium salt and Adenosine-5'-monophosphate sodium salt were purchased from Sigma-Aldrich. All the titrations have been performed with the NaHS and it is a source for H<sub>2</sub>S in aqueous solution. NaHS and Na<sub>2</sub>S are the familiar donors for the instantaneous generation of H<sub>2</sub>S. Potassium carbonate, Potassium Bromide (IR Spectroscopy), L-Cysteine, Glutathione and Silica Gel (mesh 100-200) were purchased from Loba Chemie Pvt. Ltd. DAF-FM Diacetate NO detection Kit was purchased from Thermo Fischer Scientific. 1,2-Dioleoyl-*sn*-glycero-3-phosphocholine (DOPC) was purchased from Avanti Polar Lipids. All the solvents purchased were of analytical grade and used without further purification.

### 2. Instrumentation Methods

<sup>1</sup>H-NMR spectra were performed on Bruker Advance 500 MHz at room temperature using CD<sub>3</sub>CN as solvent. Chemical shift values are reported in ppm values using TMS as an internal reference. Waters Q-ToF mass spectrometer was used to record ESI-mass spectrum using positive ion mode. An Evolution 201 UV-Vis spectrophotometer was used to record UV absorption spectra with quartz cells of 1.0 cm path length. For the preparation of vesicles, Mini-Extruder set from Avanti Polar Lipids was used. To record the fluorescence spectra, Cary Eclipse fluorescence spectrophotometer

was used. A zeta sizer Nano ZS instrument equipped with a He-Ne laser in backscattering mode at a scattering angle of 173° was employed for the DLS experiments. SHIMADZU Infrared spectrophotometer was used for performing FT-IR experiments using KBr pellet method.

### 3. Experimental Section

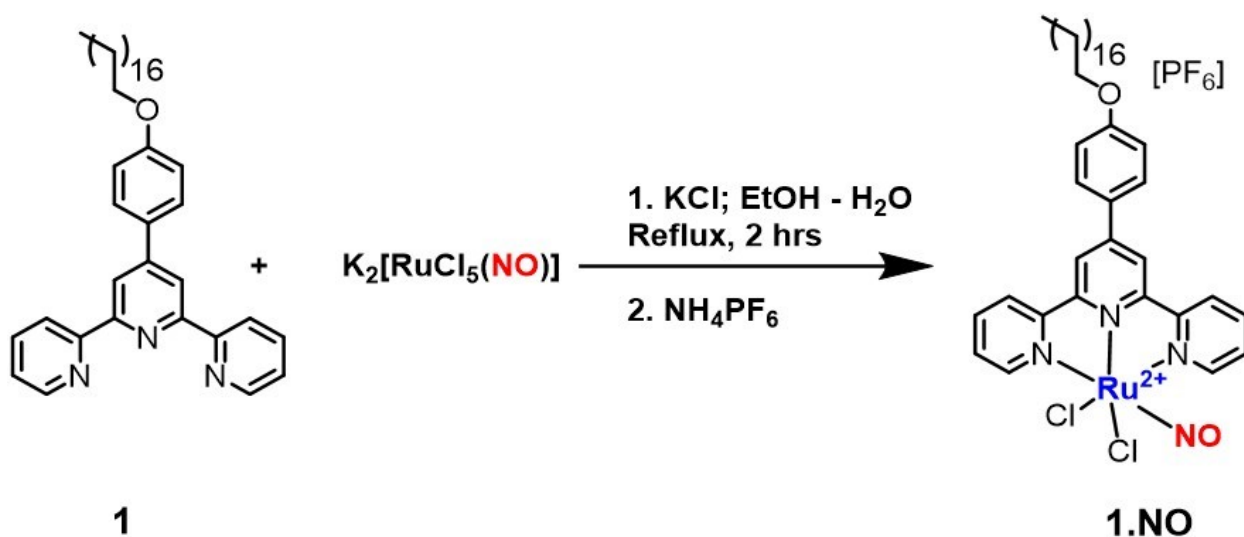

#### 3.1 Synthesis of [C<sub>18</sub>-Terpy-Ru(Cl)<sub>2</sub>NO](PF<sub>6</sub>) (**1.NO**)

According to the procedure reported in our previous work<sup>1</sup>, ligand **1** was synthesized. 300 mg of ligand **1** (0.519 mmol) was refluxed in 40 ml solution of EtOH-H<sub>2</sub>O (3:1) mixture. 464 mg of KCl (6.228 mmol) and 242 mg of K<sub>2</sub>[RuCl<sub>5</sub>(NO)] (0.6228 mmol) were added upon dissolving to the solution of **1**. The reaction was allowed to reflux for another 4 h. Upon cooling the reaction mixture was completely dried using rota-evaporator. The solid crude was then dissolved in methanol to remove any unreacted KCl and K<sub>2</sub>[RuCl<sub>5</sub>(NO)]. To the filtrate, aqueous solution of excess NH<sub>4</sub>PF<sub>6</sub> was added and dried again using rota-evaporator. The precipitates were suspended in water and stirred to dissolve excess NH<sub>4</sub>PF<sub>6</sub> salt. It was filtered using glass crucible (G4 sintered) to get orangish-brown solid, washed with water and diethyl ether to obtain the expected product **1.NO**. The pure final product was obtained by recrystallization using CH<sub>3</sub>CN-diethyl ether mixture using diffusion method. Yield: (240 mg, 46%), IR (KBr):  $\nu_{max}$  (cm<sup>-1</sup>) 1897 (N-O). <sup>1</sup>H-NMR (CD<sub>3</sub>CN, 500 MHz):  $\delta$  (ppm) 8.79 (dd, J = 5.6 Hz, 0.9 Hz, 2H), 8.70 (s, 2H), 8.69-8.64 (m, 2H), 8.42 (td, J = 7.9 Hz, 1.4 Hz, 2H), 8.09 (d, J = 8.9 Hz, 2H), 7.91-7.87 (m, 2H), 7.23 (d, J = 8.9 Hz, 2H), 4.17 (t, J = 6.6 Hz, 2H), 1.87-1.82 (m, 2H), 1.54-1.49 (m, 2H), 1.30 (s, 28H),

0.90 (t, J = 5.3 Hz, 3H). ESI-MS:  $m/z$  [M-PF<sub>6</sub>]<sup>+</sup> : calcd. 779.83, found 779.27, HR-MS:  $m/z$  [M-PF<sub>6</sub>]<sup>+</sup> : calcd. 779.2433, found 779.2422.

### 3.2 Preparation of nanoscale vesicles using **1.NO** and DOPC

5 mol % of the **1.NO** complex and DOPC lipid was used to prepare the unilamellar vesicles by thin-film hydration method using mini-extruder set purchased from Avanti Polar Lipids. For the preparation of vesicles, 5 μmol solution of DOPC lipid in chloroform was taken and 0.5 μmol solution of **1.NO** in CHCl<sub>3</sub> was added to it. A thin lipid film was formed upon drying the organic solvent. 5 mL of HPLC grade water was added to the thin film and sonicated for 90 minutes at 60°C to obtain multilamellar lipid suspension. A polycarbonate membrane with a pore size of 0.1 μm was used to homogenize the multilamellar lipid solution by extrusion using the Avanti Polar Lipid Extrusion Set. The orangish-colored vesicles solution was considered to be free of impurities and used without any further treatment. The prepared vesicles **Lip-1.NO** were used within a week and stored at 20°C.

### 3.3 Study of NO release from **1.NO** by UV-Vis spectroscopy

5% CH<sub>3</sub>CN-H<sub>2</sub>O solution of **1.NO** ( $24 \times 10^{-6}$  M, 2 mL) was used for recording the UV-Vis absorption spectra. Each spectrum was recorded after irradiating with light ( $\lambda = 410$  nm, 3W) for 60 min. The quartz cuvette used was of 1.0 cm path length. A distance of 4 cm was maintained between the light source and the quartz cuvette for the irradiation experiments. The changes in the absorbance at 492 nm were monitored against time.

### 3.4 DAF-FM DA assay of **1.NO** and **Lip-1.NO**

A non-fluorescent probe DAF-FM DA is used to qualitatively detect the NO release from **1.NO**. DAF-FM DA probe (10 μM) in DMSO was added to the 5% CH<sub>3</sub>CN-H<sub>2</sub>O solution of **1.NO** (26 μM) and in buffer solution of **Lip-1.NO** (HEPES, 10 mM, pH=7.4), respectively. With the gradual addition of analyte H<sub>2</sub>S (0-2 mM), changes in emission intensity were recorded. The increase in fluorescence intensity at 515 nm was monitored to confirm the H<sub>2</sub>S induced release of NO from **1.NO**.

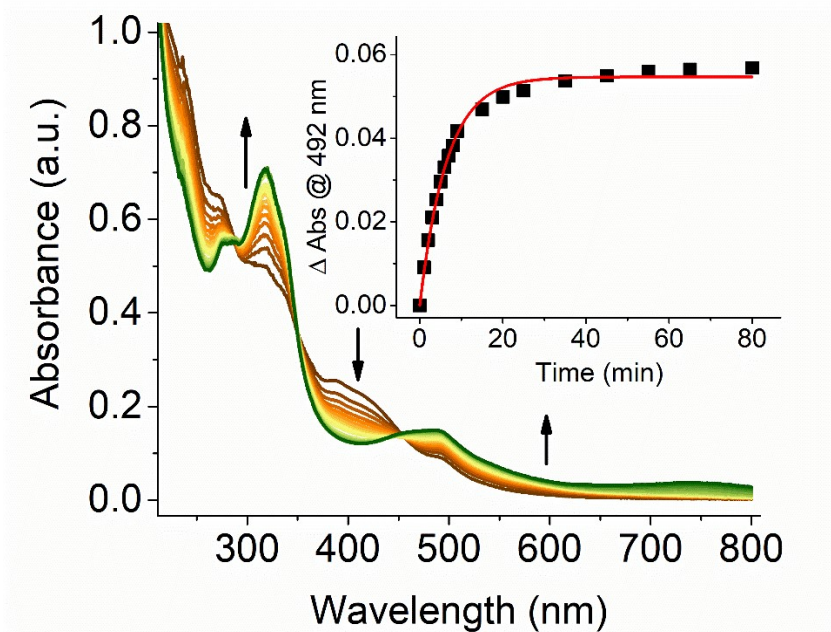

**Figure S1:** Changes in UV-Vis absorption spectra observed for **1.NO** (26  $\mu\text{M}$ ) in 5%  $\text{CH}_3\text{CN}$ - $\text{H}_2\text{O}$  when irradiated with Blue light. Repetitive scans were taken at different time intervals for 80 mins. *Inset:* Time dependent change in absorption spectra.

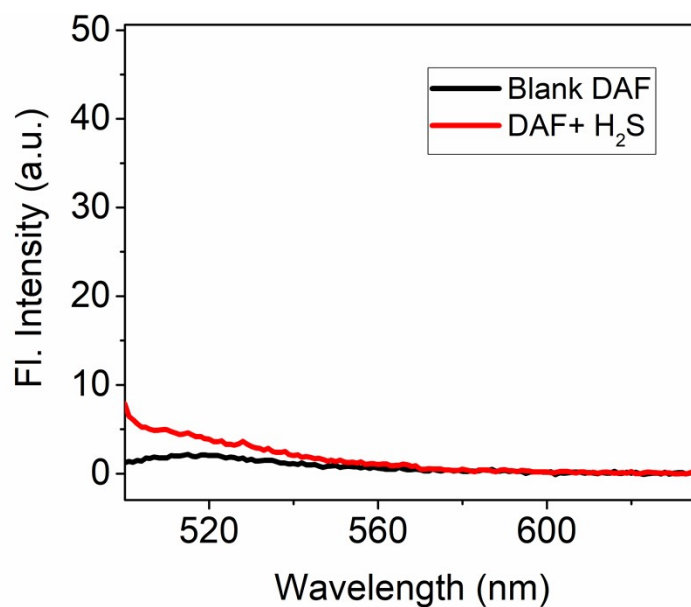

**Figure S2:** Blank DAF-FM DA assay with  $\text{H}_2\text{S}$  (2mM).

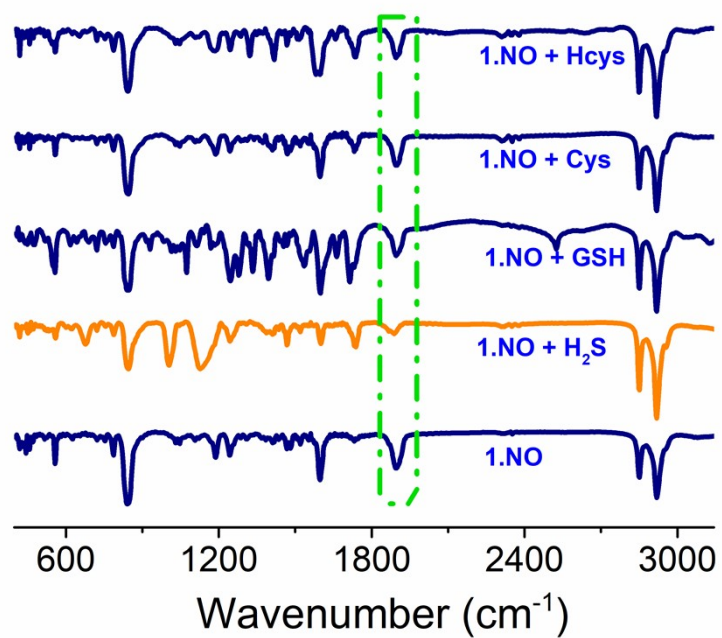

**Figure S3:** FT-IR assay of **1.NO** with the thiols.

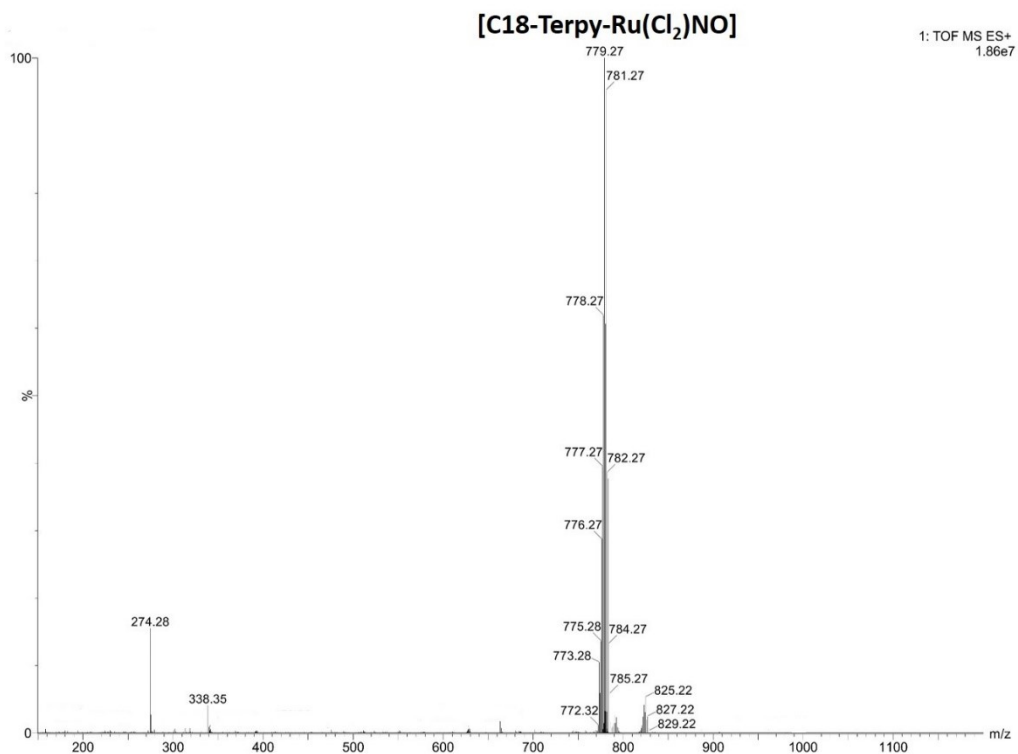

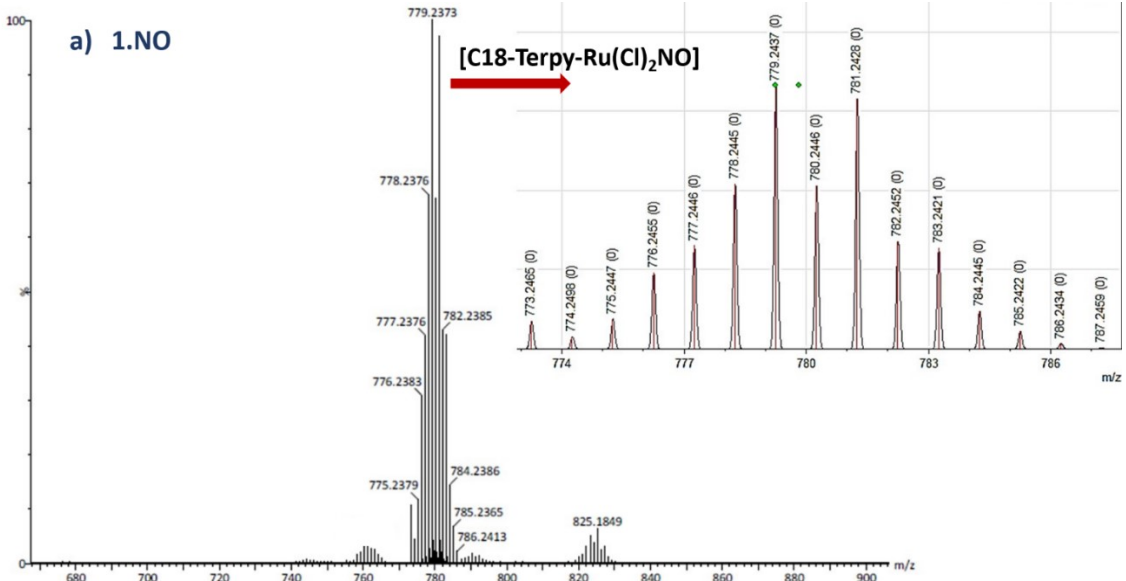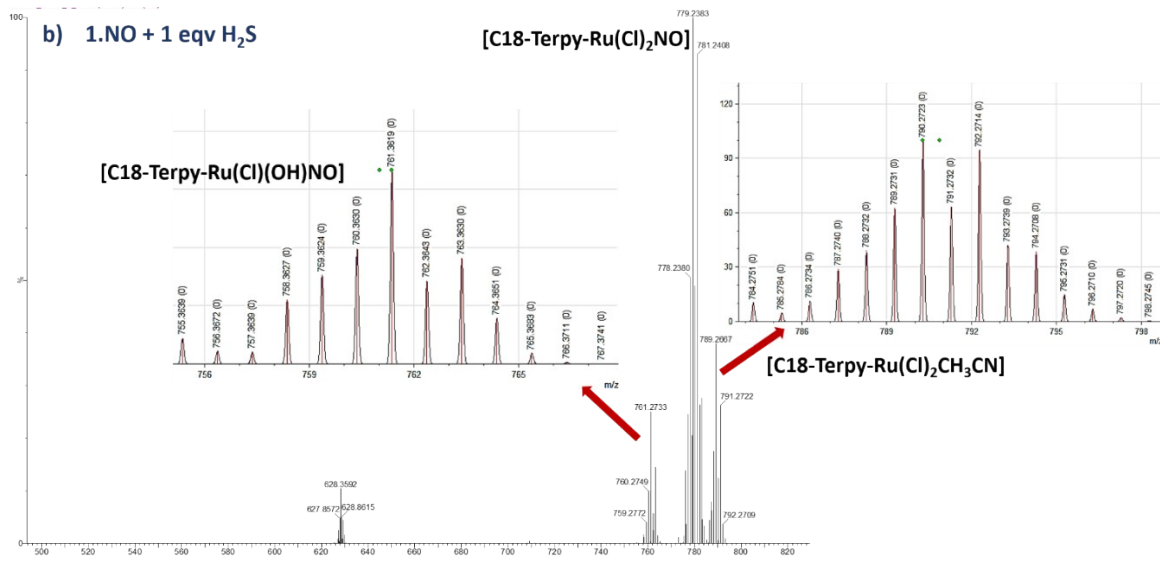

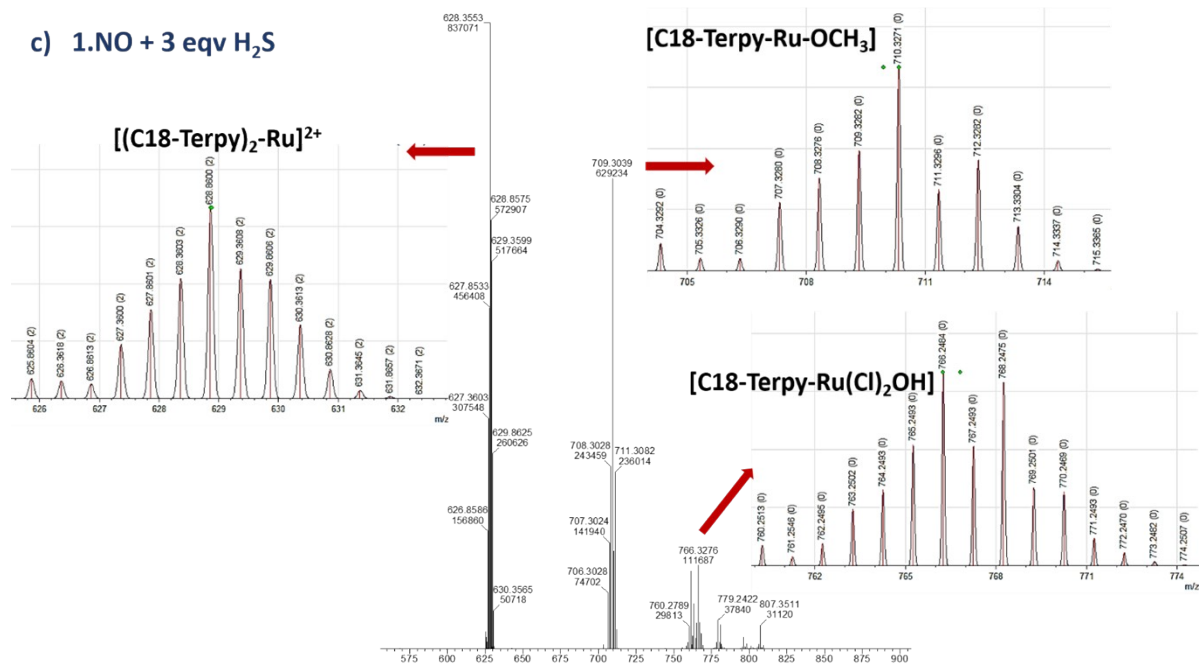

**Figure S4:** ESI-Mass (+ve mode) spectrum of (a) **1.NO**, (b) upon addition of 1 eqv H<sub>2</sub>S and (c) 3 eqv H<sub>2</sub>S in CH<sub>3</sub>CN-water mixture.

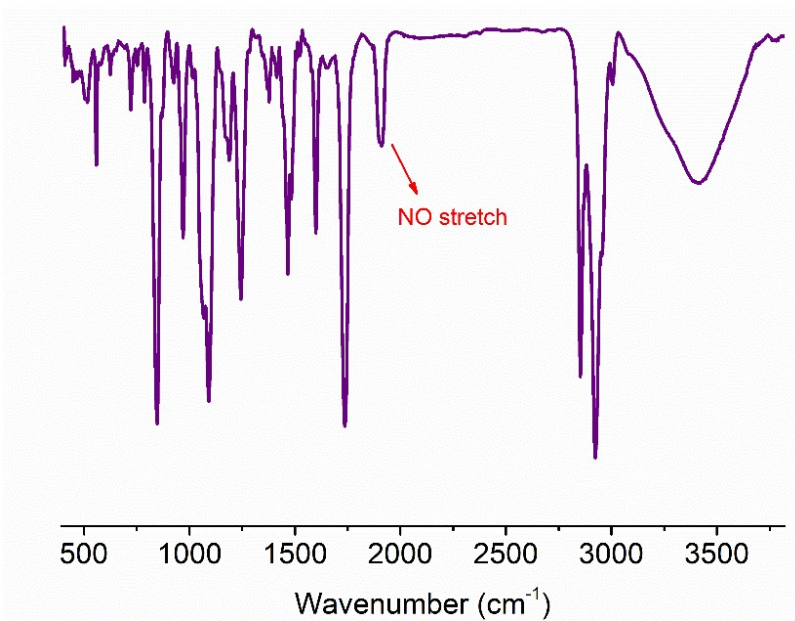

**Figure S5:** FT-IR spectrum of **Lip-1.NO**

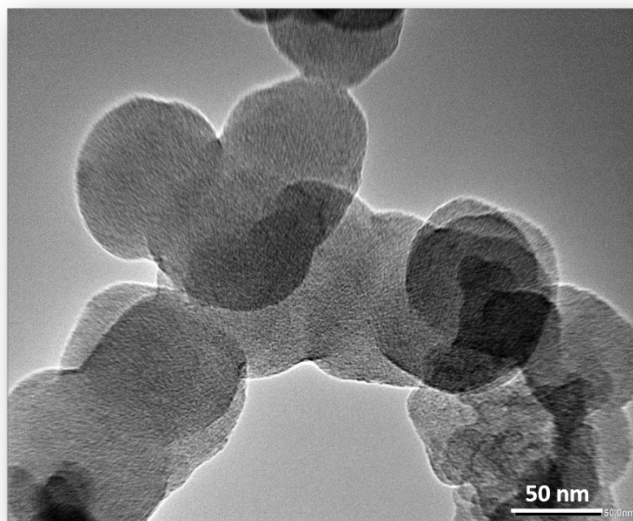

**Figure S6:** HR-TEM image of **Lip-1.NO<sup>2</sup>**

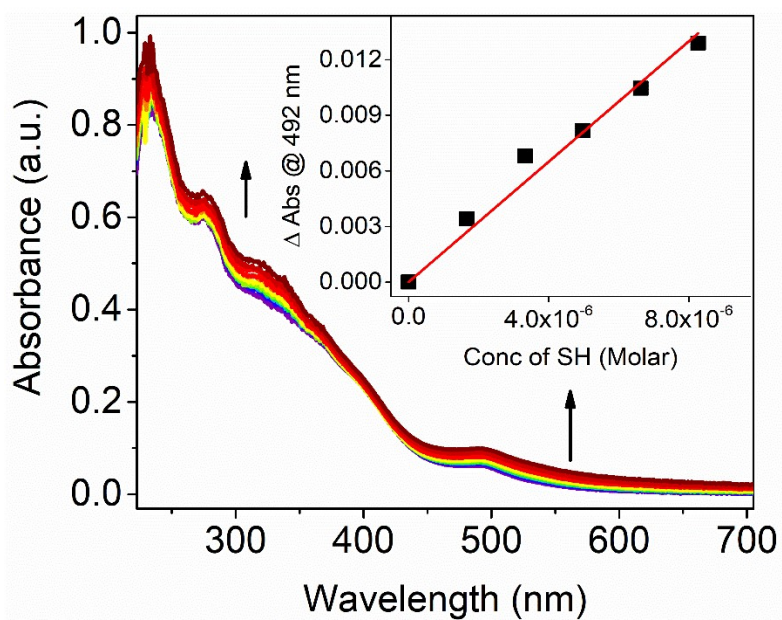

**Figure S7:** The absorption spectra of **Lip-1.NO** (24 μM) with different concentrations of H<sub>2</sub>S (0–165 μM).



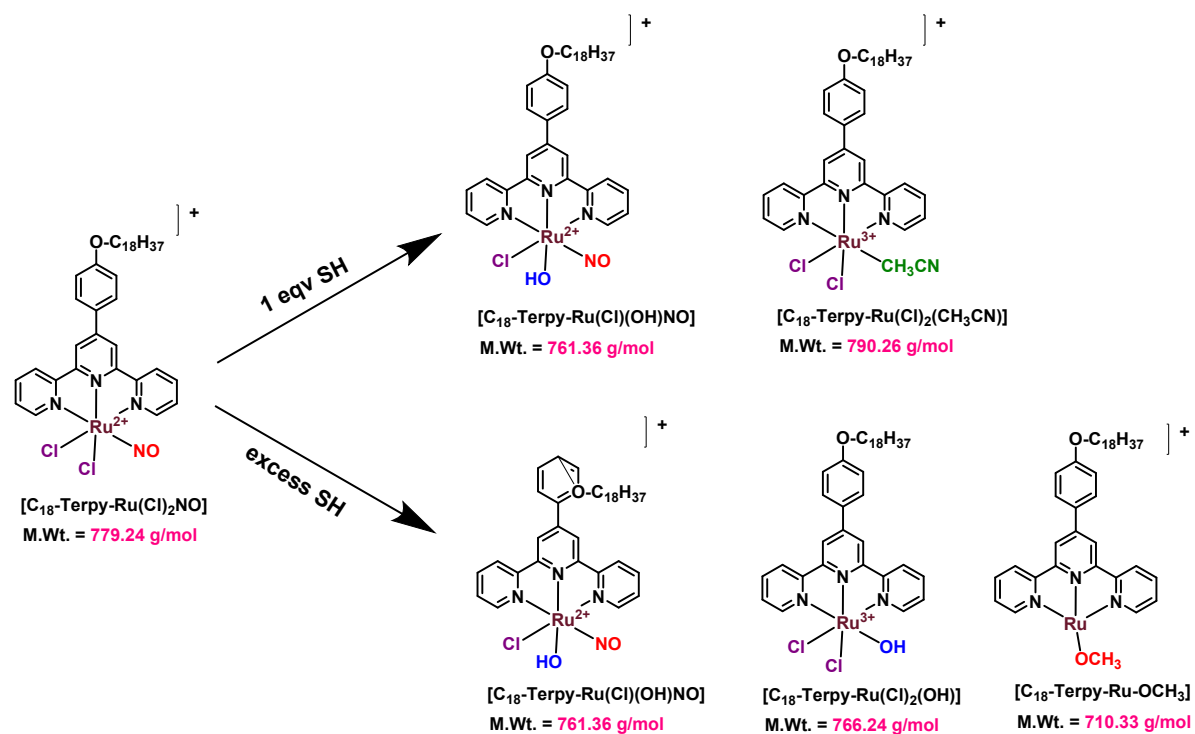

**Scheme S1:** Formation various possible by products upon interaction of **1.NO** with H<sub>2</sub>S predicted by mass analysis.

### Reference:

1. N. Sharma, P. Arjunan, S. Marepally, N. Jain, A. R. Naziruddin, A. Ghosh, C. R. Mariappan and D. A. Jose, *J. Photochem. Photobiol. A: Chem*, 2022, **425**, 113703.
2. The detailed characterization of **Lip-1.NO** is described by us elsewhere in an another work published in N. Sharma, D. A. Jose, N. Jain, S. Parmar, A. Srivastav, J. Chawla, A. R. Naziruddin and C. R. Mariappan, *Langmuir*, 2022, 44, 13602–13612
